# Supplementary material
Source: PubMed Central journal article supplement (PMC1200278)

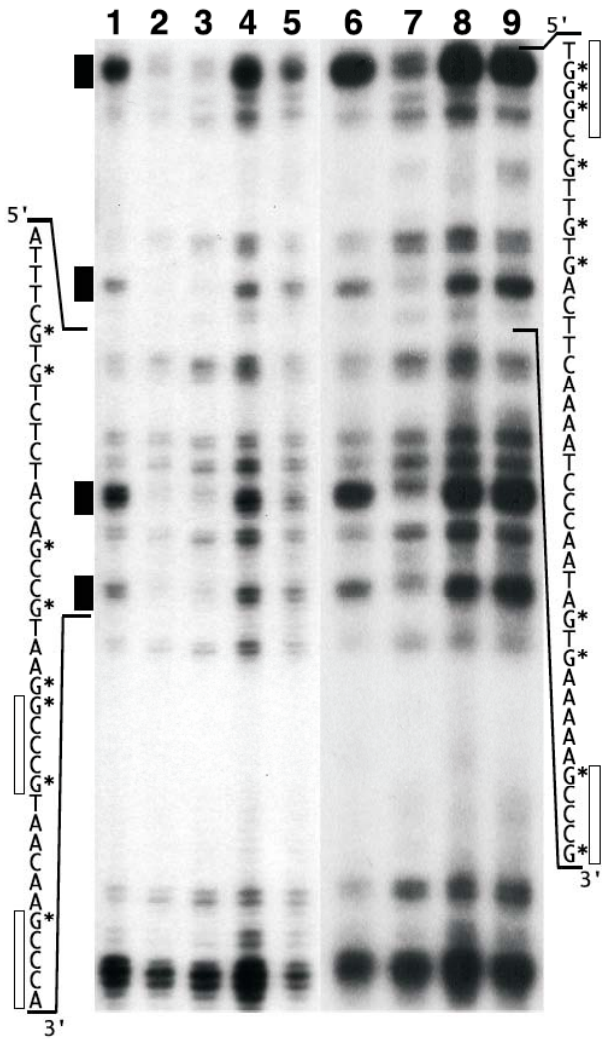

Supplement: pnas_0504039102_1.pdf [file pnas_0504039102_1.pdf]

|                      | 1 | 2                                                                                 | 3 | 4 | 5                                                                                  | 6 |
|----------------------|---|-----------------------------------------------------------------------------------|---|---|------------------------------------------------------------------------------------|---|
| wt GCCCR*            | + | +                                                                                 | + | + | +                                                                                  | + |
| wt GCCCR             | - | -                                                                                 | - | - |  |   |
| p33 <sup>TCP20</sup> | - |  |   |   | +                                                                                  | + |

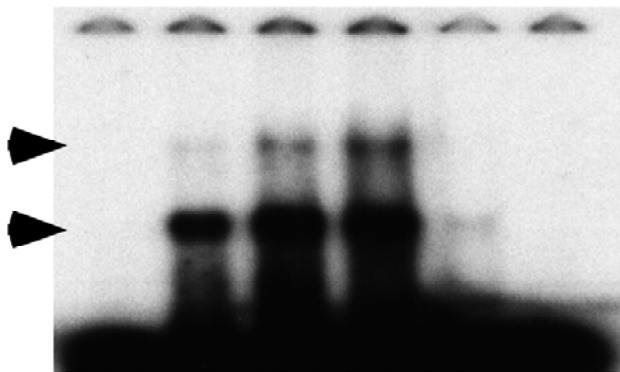

Supplement: pnas_0504039102_2.pdf [file pnas_0504039102_2.pdf]
